# Supplementary material
Source: publisher figshare collection journal article supplement (https://geolsoc.figshare.com/ndownloader/files/5426936)
Supplement: Supplementary file 1 [file 5426936]

ROCK COMPOSITIONS CALCULATED USING OBSERVED MODES AND VOGT & FLOWER (1989) MINERAL ANALYSES
		Density	2.56	2.65	2.62	3.4	3.3	3.1	5.1	2.65	3.45
			Kspar	Plag	Quartz	Cpx	Hornblende	Biotite	Magnetite	Chlorite	Epidote
Rock Type	Sample
			J6153	J6216		J6048	J6153	J6153	J6048	Ward	J6326		No density correction	Density correction	OBSERVED
			Kspar	Plag	Quartz	Cpx	Hornblende	Biotite	Magnetite	Chlorite	Epidote		Calculated	Calculated	CS016
		SiO2	64.17	57.93	100.00	51.83	43.15	36.70	0.53	30.74	38.07		65.6	64.4	63.3	SiO2		176.9
		TiO2	0.00	0.00	0.00	0.14	1.85	4.91	0.00	0.47	0.40		1.0	1.2	0.7	TiO2		3.2
		Al2O3	18.18	26.79	0.00	0.98	9.21	13.19	0.00	23.02	22.90		15.0	15.0	16.0	Al2O3		41.1
		FeO	0.00	0.14	0.00	11.16	21.73	26.77	98.92	35.47	13.60		6.5	7.3	5.1	FeO*		20.0
		MgO	0.00	0.00	0.00	12.26	8.94	7.81	0.16	8.47	0.17		2.0	2.2	2.7	MgO		6.1
		MnO	0.00	0.00	0.00	0.62	0.50	0.37	0.00	0.83	0.00		0.1	0.1	0.1	MnO		0.3
		CaO	0.26	9.37	0.00	22.57	11.43	0.18	0.00	0.12	24.82		4.2	4.2	4.7	CaO		11.5
		Na2O	1.39	5.44	0.00	0.34	1.87	0.17	0.00	0.36	0.00		2.4	2.3	2.7	Na2O		6.3
		K2O	15.00	0.33	0.00	0.00	1.32	9.85	0.00	0.51	0.00		3.1	3.3	3.3	K2O		9.1
			99.00	100.00	100.00	99.90	100.00	99.95	99.61	100.00	99.96		99.9	100.0				274.6
	Mode %
Bt Granite	CS016	100.0	7.0	39.7	29.0		4.0	19.3		1.0
			J6153	J6216		J6048	J6153	J6153	J6048	Ward	J6326		No density correction	Density correction	OBSERVED
			Kspar	Plag	Quartz	Cpx	Hornblende	Biotite	Magnetite	Chlorite	Epidote		Calculated	Calculated	CS018
		SiO2	64.17	57.93	100.00	51.83	43.15	36.70	0.53	30.74	38.07		61.6	60.4	60.5	SiO2		169.0
		TiO2	0.00	0.00	0.00	0.14	1.85	4.91	0.00	0.47	0.40		0.7	0.9	0.7	TiO2		2.4
		Al2O3	18.18	26.79	0.00	0.98	9.21	13.19	0.00	23.02	22.90		15.1	14.9	15.0	Al2O3		41.6
		FeO	0.00	0.14	0.00	11.16	21.73	26.77	98.92	35.47	13.60		7.0	8.4	6.4	FeO*		23.5
		MgO	0.00	0.00	0.00	12.26	8.94	7.81	0.16	8.47	0.17		2.5	2.9	3.7	MgO		8.1
		MnO	0.00	0.00	0.00	0.62	0.50	0.37	0.00	0.83	0.00		0.1	0.2	0.1	MnO		0.4
		CaO	0.26	9.37	0.00	22.57	11.43	0.18	0.00	0.12	24.82		5.6	5.9	5.9	CaO		16.5
		Na2O	1.39	5.44	0.00	0.34	1.87	0.17	0.00	0.36	0.00		2.4	2.3	2.4	Na2O		6.5
		K2O	15.00	0.33	0.00	0.00	1.32	9.85	0.00	0.51	0.00		4.3	4.2	3.6	K2O		11.7
			99.00	100.00	100.00	99.90	100.00	99.95	99.61	100.00	99.96		99.4	100.0				279.6
	Mode %
Hb Granite	CS018	99.7	21.7	30.3	18.0		21.7	7.0	0.3		0.7
			J6153	J6216		J6048	J6153	J6153	J6048	Ward	J6326		No density correction	Density correction	OBSERVED
			Kspar	Plag	Quartz	Cpx	Hornblende	Biotite	Magnetite	Chlorite	Epidote		Calculated	Calculated	CS019
		SiO2	64.17	57.93	100.00	51.83	43.15	36.70	0.53	30.74	38.07		60.1	58.6	60.4	SiO2		166.4
		TiO2	0.00	0.00	0.00	0.14	1.85	4.91	0.00	0.47	0.40		0.8	0.9	0.7	TiO2		2.6
		Al2O3	18.18	26.79	0.00	0.98	9.21	13.19	0.00	23.02	22.90		15.3	14.9	15.1	Al2O3		42.2
		FeO	0.00	0.14	0.00	11.16	21.73	26.77	98.92	35.47	13.60		8.0	9.4	6.6	FeO*		26.7
		MgO	0.00	0.00	0.00	12.26	8.94	7.81	0.16	8.47	0.17		2.9	3.4	3.8	MgO		9.6
		MnO	0.00	0.00	0.00	0.62	0.50	0.37	0.00	0.83	0.00		0.2	0.2	0.1	MnO		0.5
		CaO	0.26	9.37	0.00	22.57	11.43	0.18	0.00	0.12	24.82		6.2	6.5	6.6	CaO		18.5
		Na2O	1.39	5.44	0.00	0.34	1.87	0.17	0.00	0.36	0.00		2.5	2.5	2.5	Na2O		7.0
		K2O	15.00	0.33	0.00	0.00	1.32	9.85	0.00	0.51	0.00		3.8	3.6	3.0	K2O		10.3
			99.00	100.00	100.00	99.90	100.00	99.95	99.61	100.00	99.96		99.8	100.0				283.9
	Mode %
Hb Granite	CS019	100.0	18.0	32.3	15.7		27.3	6.3	0.3
			J6153	J6216		J6048	J6153	J6153	J6048	Ward	J6326		No density correction	Density correction	OBSERVED
			Kspar	Plag	Quartz	Cpx	Hornblende	Biotite	Magnetite	Chlorite	Epidote		Calculated	Calculated	CS022
		SiO2	64.17	57.93	100.00	51.83	43.15	36.70	0.53	30.74	38.07		64.2	62.9	62.6	SiO2		174.9
		TiO2	0.00	0.00	0.00	0.14	1.85	4.91	0.00	0.47	0.40		0.9	1.0	0.7	TiO2		2.8
		Al2O3	18.18	26.79	0.00	0.98	9.21	13.19	0.00	23.02	22.90		15.7	15.5	15.9	Al2O3		43.0
		FeO	0.00	0.14	0.00	11.16	21.73	26.77	98.92	35.47	13.60		6.3	7.2	5.4	FeO*		20.0
		MgO	0.00	0.00	0.00	12.26	8.94	7.81	0.16	8.47	0.17		2.1	2.5	3.2	MgO		6.9
		MnO	0.00	0.00	0.00	0.62	0.50	0.37	0.00	0.83	0.00		0.1	0.1	0.1	MnO		0.4
		CaO	0.26	9.37	0.00	22.57	11.43	0.18	0.00	0.12	24.82		5.7	5.8	5.5	CaO		16.1
		Na2O	1.39	5.44	0.00	0.34	1.87	0.17	0.00	0.36	0.00		2.8	2.7	2.7	Na2O		7.5
		K2O	15.00	0.33	0.00	0.00	1.32	9.85	0.00	0.51	0.00		2.2	2.3	2.6	K2O		6.5
			99.00	100.00	100.00	99.90	100.00	99.95	99.61	100.00	99.96		100.0	100.0				277.8
	Mode %
Bt Granite	CS022	100.0	4.0	45.0	25.3		12.7	13.0
			J6153	J6216		J6048	J6153	J6153	J6048	Ward	J6326		No density correction	Density correction	OBSERVED
			Kspar	Plag	Quartz	Cpx	Hornblende	Biotite	Magnetite	Chlorite	Epidote		Calculated	Calculated	CS023
		SiO2	64.17	57.93	100.00	51.83	43.15	36.70	0.53	30.74	38.07		64.6	63.6	62.2	SiO2		174.2
		TiO2	0.00	0.00	0.00	0.14	1.85	4.91	0.00	0.47	0.40		0.6	0.7	0.7	TiO2		2.0
		Al2O3	18.18	26.79	0.00	0.98	9.21	13.19	0.00	23.02	22.90		16.2	16.1	16.1	Al2O3		44.0
		FeO	0.00	0.14	0.00	11.16	21.73	26.77	98.92	35.47	13.60		6.5	7.2	5.7	FeO*		19.7
		MgO	0.00	0.00	0.00	12.26	8.94	7.81	0.16	8.47	0.17		1.9	2.1	3.4	MgO		5.9
		MnO	0.00	0.00	0.00	0.62	0.50	0.37	0.00	0.83	0.00		0.1	0.1	0.1	MnO		0.4
		CaO	0.26	9.37	0.00	22.57	11.43	0.18	0.00	0.12	24.82		5.3	5.4	5.8	CaO		14.8
		Na2O	1.39	5.44	0.00	0.34	1.87	0.17	0.00	0.36	0.00		2.6	2.5	2.8	Na2O		7.0
		K2O	15.00	0.33	0.00	0.00	1.32	9.85	0.00	0.51	0.00		2.0	2.1	2.0	K2O		5.8
			99.00	100.00	100.00	99.90	100.00	99.95	99.61	100.00	99.96		99.9	100.0				273.8
	Mode %
Bt Granite	CS023	100.0	5.7	43.0	27.0		7.7	9.3		6.0	1.3
			J6153	J6216		J6048	J6153	J6153	J6048	Ward	J6326		No density correction	Density correction	OBSERVED
			Kspar	Plag	Quartz	Cpx	Hornblende	Biotite	Magnetite	Chlorite	Epidote		Calculated	Calculated	CS028
		SiO2	64.17	57.93	100.00	51.83	43.15	36.70	0.53	30.74	38.07		65.3	64.3	64.4	SiO2		176.1
		TiO2	0.00	0.00	0.00	0.14	1.85	4.91	0.00	0.47	0.40		0.4	0.5	0.5	TiO2		1.4
		Al2O3	18.18	26.79	0.00	0.98	9.21	13.19	0.00	23.02	22.90		14.9	14.7	15.1	Al2O3		40.1
		FeO	0.00	0.14	0.00	11.16	21.73	26.77	98.92	35.47	13.60		4.7	5.6	4.7	FeO*		15.3
		MgO	0.00	0.00	0.00	12.26	8.94	7.81	0.16	8.47	0.17		1.8	2.2	2.6	MgO		6.0
		MnO	0.00	0.00	0.00	0.62	0.50	0.37	0.00	0.83	0.00		0.1	0.1	0.1	MnO		0.3
		CaO	0.26	9.37	0.00	22.57	11.43	0.18	0.00	0.12	24.82		4.6	5.0	4.4	CaO		13.7
		Na2O	1.39	5.44	0.00	0.34	1.87	0.17	0.00	0.36	0.00		2.2	2.2	2.7	Na2O		5.9
		K2O	15.00	0.33	0.00	0.00	1.32	9.85	0.00	0.51	0.00		5.7	5.4	4.7	K2O		14.9
			99.00	100.00	100.00	99.90	100.00	99.95	99.61	100.00	99.96		99.7	100.0				273.8
	Mode %
Hb Granite	CS028	100.0	34.7	24.3	20.0		19.0	1.7			0.3
			J6153	J6216		J6048	J6153	J6153	J6048	Ward	J6326		No density correction	Density correction	OBSERVED
			Kspar	Plag	Quartz	Cpx	Hornblende	Biotite	Magnetite	Chlorite	Epidote		Calculated	Calculated	CS031
		SiO2	64.17	57.93	100.00	51.83	43.15	36.70	0.53	30.74	38.07		62.5	62.4	63.6	SiO2		167.2
		TiO2	0.00	0.00	0.00	0.14	1.85	4.91	0.00	0.47	0.40		0.3	0.3	0.5	TiO2		0.8
		Al2O3	18.18	26.79	0.00	0.98	9.21	13.19	0.00	23.02	22.90		16.9	16.8	15.1	Al2O3		45.1
		FeO	0.00	0.14	0.00	11.16	21.73	26.77	98.92	35.47	13.60		4.8	6.3	4.9	FeO*		16.9
		MgO	0.00	0.00	0.00	12.26	8.94	7.81	0.16	8.47	0.17		1.4	1.7	2.3	MgO		4.5
		MnO	0.00	0.00	0.00	0.62	0.50	0.37	0.00	0.83	0.00		0.1	0.1	0.1	MnO		0.3
		CaO	0.26	9.37	0.00	22.57	11.43	0.18	0.00	0.12	24.82		5.2	5.5	5.3	CaO		14.7
		Na2O	1.39	5.44	0.00	0.34	1.87	0.17	0.00	0.36	0.00		2.7	2.7	2.8	Na2O		7.3
		K2O	15.00	0.33	0.00	0.00	1.32	9.85	0.00	0.51	0.00		4.3	4.2	3.9	K2O		11.2
			99.00	100.00	100.00	99.90	100.00	99.95	99.61	100.00	99.96		98.1	100.0				268.1
	Mode %
Hb Granite	CS031	98.3	26.7	38.3	16.7		13.3		1.0	2.3
			J6153	J6216		J6048	J6153	J6153	J6048	Ward	J6326		No density correction	Density correction	OBSERVED
			Kspar	Plag	Quartz	Cpx	Hornblende	Biotite	Magnetite	Chlorite	Epidote		Calculated	Calculated	CS054
		SiO2	64.17	57.93	100.00	51.83	43.15	36.70	0.53	30.74	38.07		64.5	64.4	65.9	SiO2		171.6
		TiO2	0.00	0.00	0.00	0.14	1.85	4.91	0.00	0.47	0.40		0.8	0.9	0.6	TiO2		2.5
		Al2O3	18.18	26.79	0.00	0.98	9.21	13.19	0.00	23.02	22.90		14.7	14.8	16.0	Al2O3		39.6
		FeO	0.00	0.14	0.00	11.16	21.73	26.77	98.92	35.47	13.60		5.7	7.0	3.3	FeO*		18.6
		MgO	0.00	0.00	0.00	12.26	8.94	7.81	0.16	8.47	0.17		1.5	1.8	1.7	MgO		4.8
		MnO	0.00	0.00	0.00	0.62	0.50	0.37	0.00	0.83	0.00		0.1	0.1	0.1	MnO		0.2
		CaO	0.26	9.37	0.00	22.57	11.43	0.18	0.00	0.12	24.82		2.5	2.6	1.1	CaO		6.9
		Na2O	1.39	5.44	0.00	0.34	1.87	0.17	0.00	0.36	0.00		1.8	1.8	2.8	Na2O		4.7
		K2O	15.00	0.33	0.00	0.00	1.32	9.85	0.00	0.51	0.00		6.6	6.6	7.1	K2O		17.7
			99.00	100.00	100.00	99.90	100.00	99.95	99.61	100.00	99.96		98.3	100.0				266.6
Porphyritic	Mode %
Hb Granite	CS054	98.7	33.1	22.9	22.9		2.4	15.2	0.5	1.6
			J6153	J6216		J6048	J6153	J6153	J6048	Ward	J6326		No density correction	Density correction	OBSERVED
			Kspar	Plag	Quartz	Cpx	Hornblende	Biotite	Magnetite	Chlorite	Epidote		Calculated	Calculated	CS056
		SiO2	64.17	57.93	100.00	51.83	43.15	36.70	0.53	30.74	38.07		64.8	64.5	64.5	SiO2		173.1
		TiO2	0.00	0.00	0.00	0.14	1.85	4.91	0.00	0.47	0.40		0.3	0.3	0.5	TiO2		0.9
		Al2O3	18.18	26.79	0.00	0.98	9.21	13.19	0.00	23.02	22.90		16.1	16.0	15.5	Al2O3		43.0
		FeO	0.00	0.14	0.00	11.16	21.73	26.77	98.92	35.47	13.60		3.7	4.6	4.4	FeO*		12.3
		MgO	0.00	0.00	0.00	12.26	8.94	7.81	0.16	8.47	0.17		1.3	1.6	2.0	MgO		4.4
		MnO	0.00	0.00	0.00	0.62	0.50	0.37	0.00	0.83	0.00		0.1	0.1	0.1	MnO		0.3
		CaO	0.26	9.37	0.00	22.57	11.43	0.18	0.00	0.12	24.82		4.4	4.7	3.4	CaO		12.7
		Na2O	1.39	5.44	0.00	0.34	1.87	0.17	0.00	0.36	0.00		2.4	2.4	2.5	Na2O		6.4
		K2O	15.00	0.33	0.00	0.00	1.32	9.85	0.00	0.51	0.00		6.0	5.8	6.2	K2O		15.5
			99.00	100.00	100.00	99.90	100.00	99.95	99.61	100.00	99.96		99.1	100.0				268.5
	Mode %
Hb Granite	CS056	99.5	38.1	28.8	17.3		14.1		0.3	0.8
			J6153	J6216		J6048	J6153	J6153	J6048	Ward	J6326		No density correction	Density correction	OBSERVED
			Kspar	Plag	Quartz	Cpx	Hornblende	Biotite	Magnetite	Chlorite	Epidote		Calculated	Calculated	CS059
		SiO2	64.17	57.93	100.00	51.83	43.15	36.70	0.53	30.74	38.07		71.9	72.3	73.2	SiO2		187.8
		TiO2	0.00	0.00	0.00	0.14	1.85	4.91	0.00	0.47	0.40		0.1	0.2	0.2	TiO2		0.5
		Al2O3	18.18	26.79	0.00	0.98	9.21	13.19	0.00	23.02	22.90		13.8	13.9	13.9	Al2O3		36.2
		FeO	0.00	0.14	0.00	11.16	21.73	26.77	98.92	35.47	13.60		1.6	2.5	1.3	FeO*		6.4
		MgO	0.00	0.00	0.00	12.26	8.94	7.81	0.16	8.47	0.17		0.3	0.4	0.4	MgO		0.9
		MnO	0.00	0.00	0.00	0.62	0.50	0.37	0.00	0.83	0.00		0.0	0.0	0.0	MnO		0.0
		CaO	0.26	9.37	0.00	22.57	11.43	0.18	0.00	0.12	24.82		2.1	2.2	2.1	CaO		5.7
		Na2O	1.39	5.44	0.00	0.34	1.87	0.17	0.00	0.36	0.00		1.7	1.8	2.7	Na2O		4.6
		K2O	15.00	0.33	0.00	0.00	1.32	9.85	0.00	0.51	0.00		6.9	6.9	5.4	K2O		17.8
			99.00	100.00	100.00	99.90	100.00	99.95	99.61	100.00	99.96		98.6	100.0				259.8
	Mode %
Hb Granite	CS059	99.0	43.7	20.3	30.7		1.0	2.7	0.7
			J6153	J6216		J6048	J6153	J6153	J6048	Ward	J6326		No density correction	Density correction	OBSERVED
			Kspar	Plag	Quartz	Cpx	Hornblende	Biotite	Magnetite	Chlorite	Epidote		Calculated	Calculated	CS066
		SiO2	64.17	57.93	100.00	51.83	43.15	36.70	0.53	30.74	38.07		61.9	60.3	62.1	SiO2		167.3
		TiO2	0.00	0.00	0.00	0.14	1.85	4.91	0.00	0.47	0.40		0.4	0.4	0.5	TiO2		1.2
		Al2O3	18.18	26.79	0.00	0.98	9.21	13.19	0.00	23.02	22.90		16.6	16.1	15.6	Al2O3		44.7
		FeO	0.00	0.14	0.00	11.16	21.73	26.77	98.92	35.47	13.60		5.8	8.0	5.6	FeO*		22.2
		MgO	0.00	0.00	0.00	12.26	8.94	7.81	0.16	8.47	0.17		1.7	2.0	2.4	MgO		5.6
		MnO	0.00	0.00	0.00	0.62	0.50	0.37	0.00	0.83	0.00		0.1	0.1	0.1	MnO		0.3
		CaO	0.26	9.37	0.00	22.57	11.43	0.18	0.00	0.12	24.82		5.5	5.8	5.3	CaO		16.1
		Na2O	1.39	5.44	0.00	0.34	1.87	0.17	0.00	0.36	0.00		2.7	2.6	2.7	Na2O		7.3
		K2O	15.00	0.33	0.00	0.00	1.32	9.85	0.00	0.51	0.00		4.9	4.6	5.0	K2O		12.8
			99.00	100.00	100.00	99.90	100.00	99.95	99.61	100.00	99.96		99.7	100.0				277.5
	Mode %
Hb Granite	CS066	100.0	30.3	35.0	14.0		19.0		1.7
